# Supplementary material for: Ran pathway-independent regulation of mitotic Golgi disassembly by Importin-α
Source: PubMed Central journal article supplement (PMC6754406; doi:10.1038/s41467-019-12207-4), 2019-09-20
Supplement: 41467_2019_12207_MOESM1_ESM.pdf [file 41467_2019_12207_MOESM1_ESM.pdf]

## Supplementary Information

# Ran pathway-independent regulation of mitotic Golgi disassembly by Importin- $\alpha$

Chih-Chia Chang<sup>1</sup>, Ching-Jou Chen<sup>2</sup>, Cédric Grauffel<sup>3</sup>, Yu-Chung Pien<sup>2</sup>, Carmay Lim<sup>3</sup>, Su-Yi Tsai<sup>2,4</sup> & Kuo-Chiang Hsia<sup>1,5</sup>

<sup>1</sup>Institute of Molecular Biology, Academia Sinica, Taipei 11529, Taiwan.

<sup>2</sup>Department of Life Science, National Taiwan University, Taipei 10617, Taiwan.

<sup>3</sup>Institute of Biomedical Sciences, Academia Sinica, Taipei, Taiwan

<sup>4</sup>Genome and Systems Biology Degree Program, National Taiwan University and Academia Sinica, Taipei 10617, Taiwan

<sup>5</sup>Institute of Biochemistry and Molecular Biology, College of Life Sciences, National Yang-Ming University, Taipei 11221, Taiwan.

\*Correspondence and requests for materials should be addressed to S.-Y. T. (e-mail: [suyitsai@ntu.edu.tw](mailto:suyitsai@ntu.edu.tw)), and K.-C. H. (e-mail: [khsia@gate.sinica.edu.tw](mailto:khsia@gate.sinica.edu.tw))

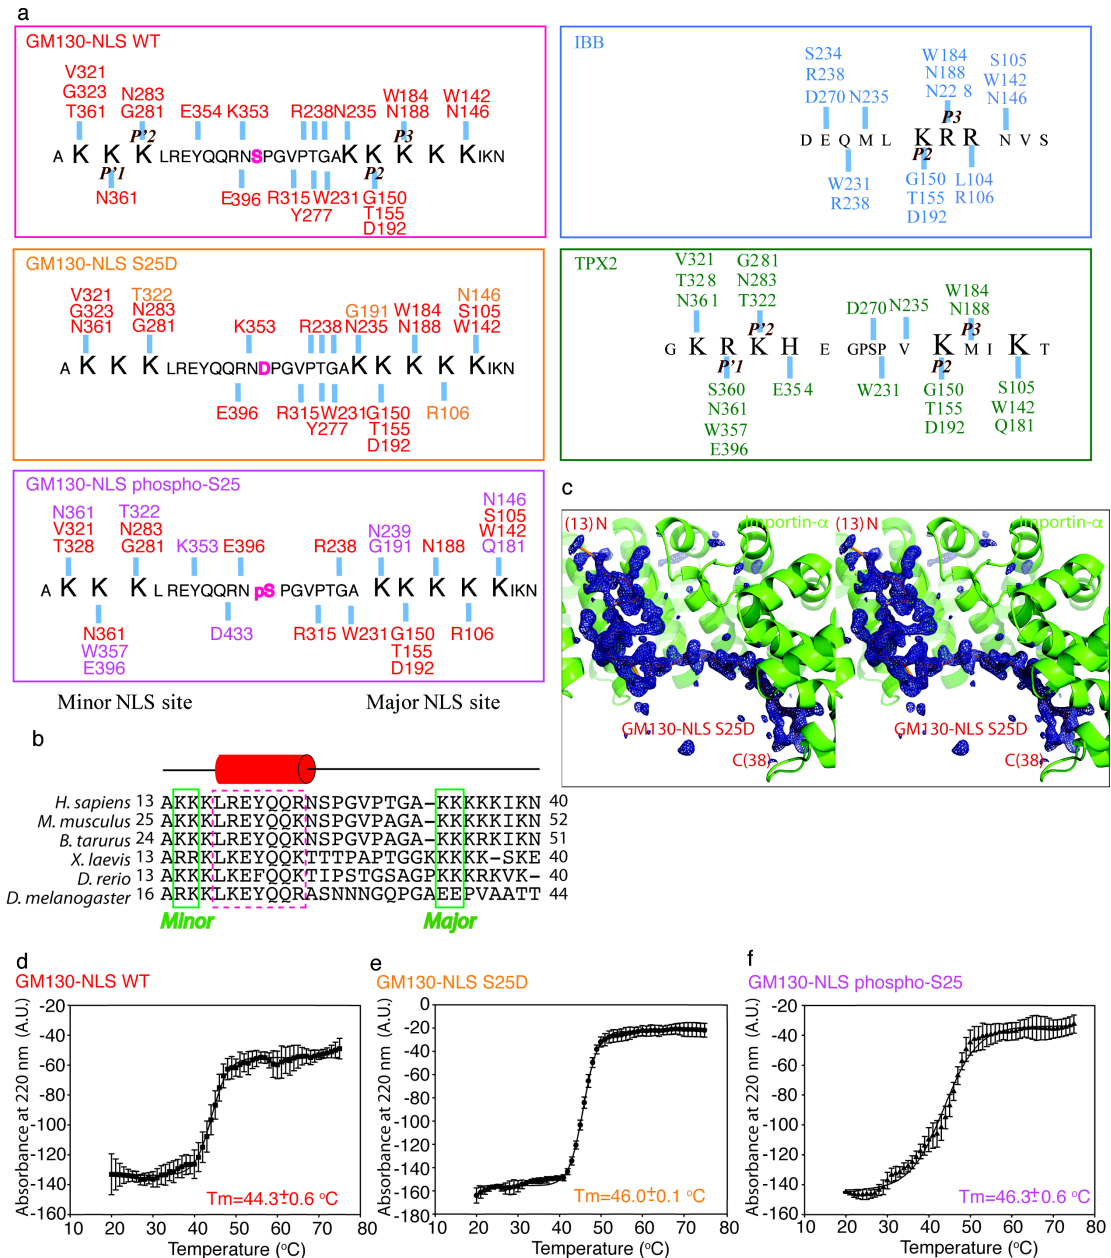

**Supplementary Figure 1. The non-classical GM130-NLS and Importin- $\alpha$  interaction network.**

**a**, Schematic illustrations of the inter-molecular interaction network of Importin- $\alpha$  in complex with wild-type peptide, as well as peptides that contain a phosphomimetic residue or a phosphorylated moiety. Serine, aspartic acid and phosphoserine are highlighted in pink. Interaction networks of Importin- $\alpha$  with IBB and TPX2 are also shown. Blue lines indicate interaction residues. **b**, Sequence alignment of GM130-NLS peptides from different species (numbers represent amino acid positions). The conserved interacting residues of the minor binding site, central  $\alpha$ -helix and major binding site are highlighted by boxes. The  $\alpha$ -helix is represented as a red cylinder. **c**, Stereo view of an omit difference (Fo-Fc) map contoured at 2.5 sigma with a superimposed atomic model of the GM130-NLS S25D•Importin- $\alpha$  complex. GM130 and Importin- $\alpha$  are displayed as ribbons (orange) and cartoons (green), respectively. **d,e,f**, Circular dichroism spectra of temperature scans at a wavelength of 222 nm for the GM130-WT (**d**), S25D (**e**) or phospho-S25 (**f**) complexes. Each complex spectrum was the average of three scans. The error bars represent the standard deviation from three scans. Melting temperature ( $T_m$ ) of each complex is indicated.

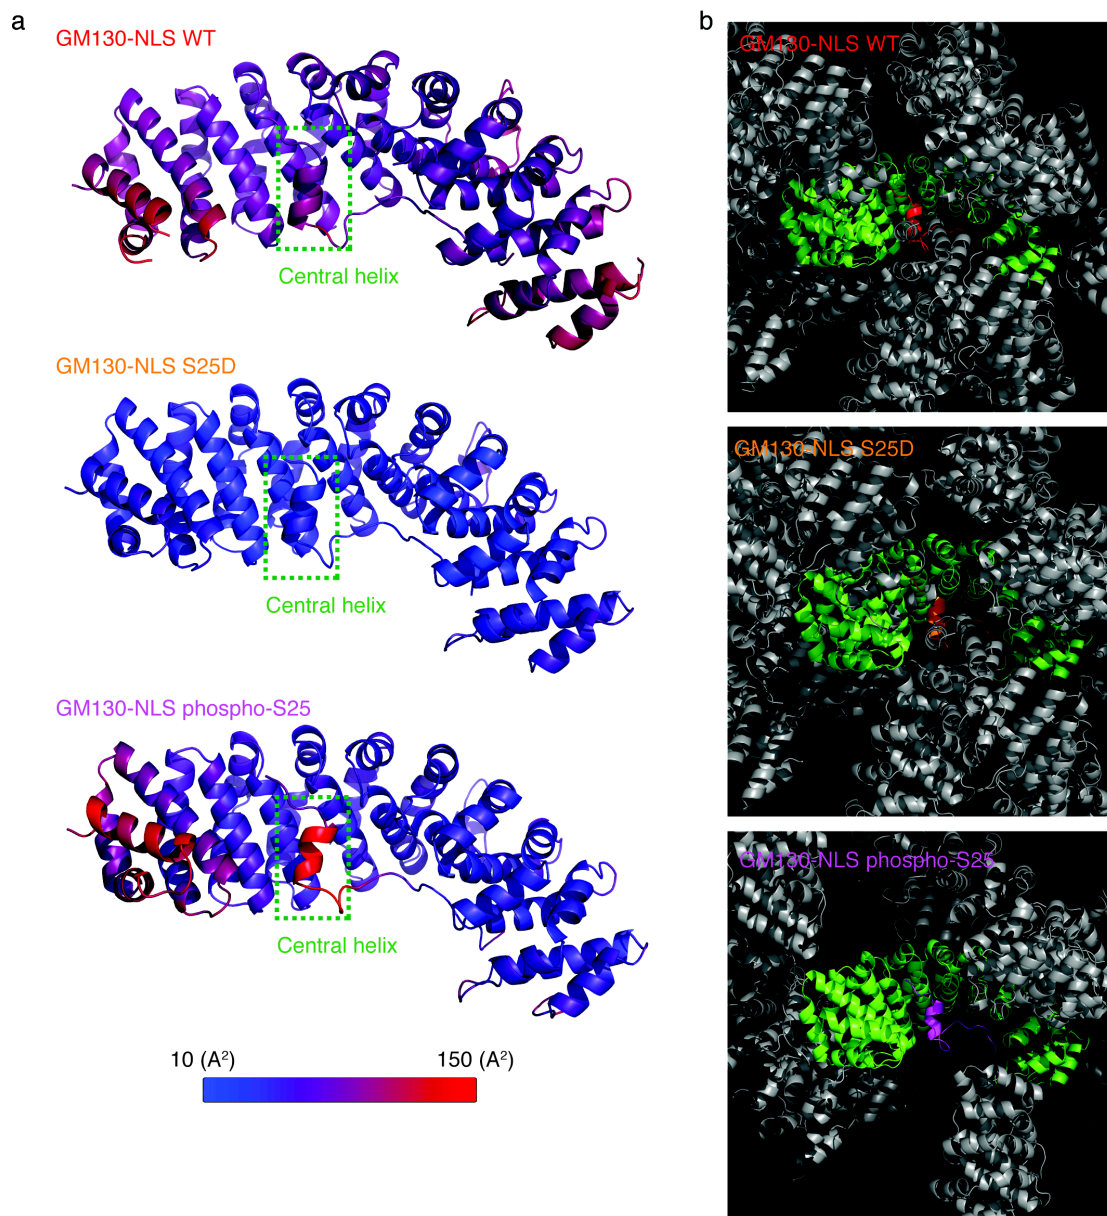

**Supplementary Figure 2. B-factors of GM130•Importin- $\alpha$  complexes in different crystalline environments.**

**a**, Structures of Importin- $\alpha$  ( $\Delta$ IBB) in complex with GM130-NLS WT (top), GM130-S25D (middle) and phospho-S25 (bottom) are colored according to B-factor values, ranging from 10  $\text{\AA}^2$  to 150  $\text{\AA}^2$ . The central helix is boxed by a green dashed line. **b**, Crystalline environments of Importin- $\alpha$  ( $\Delta$ IBB) (green) in complex with GM130-NLS WT (top), GM130-S25D (middle) and phospho-S25 (bottom). Symmetry-related molecules are colored gray.

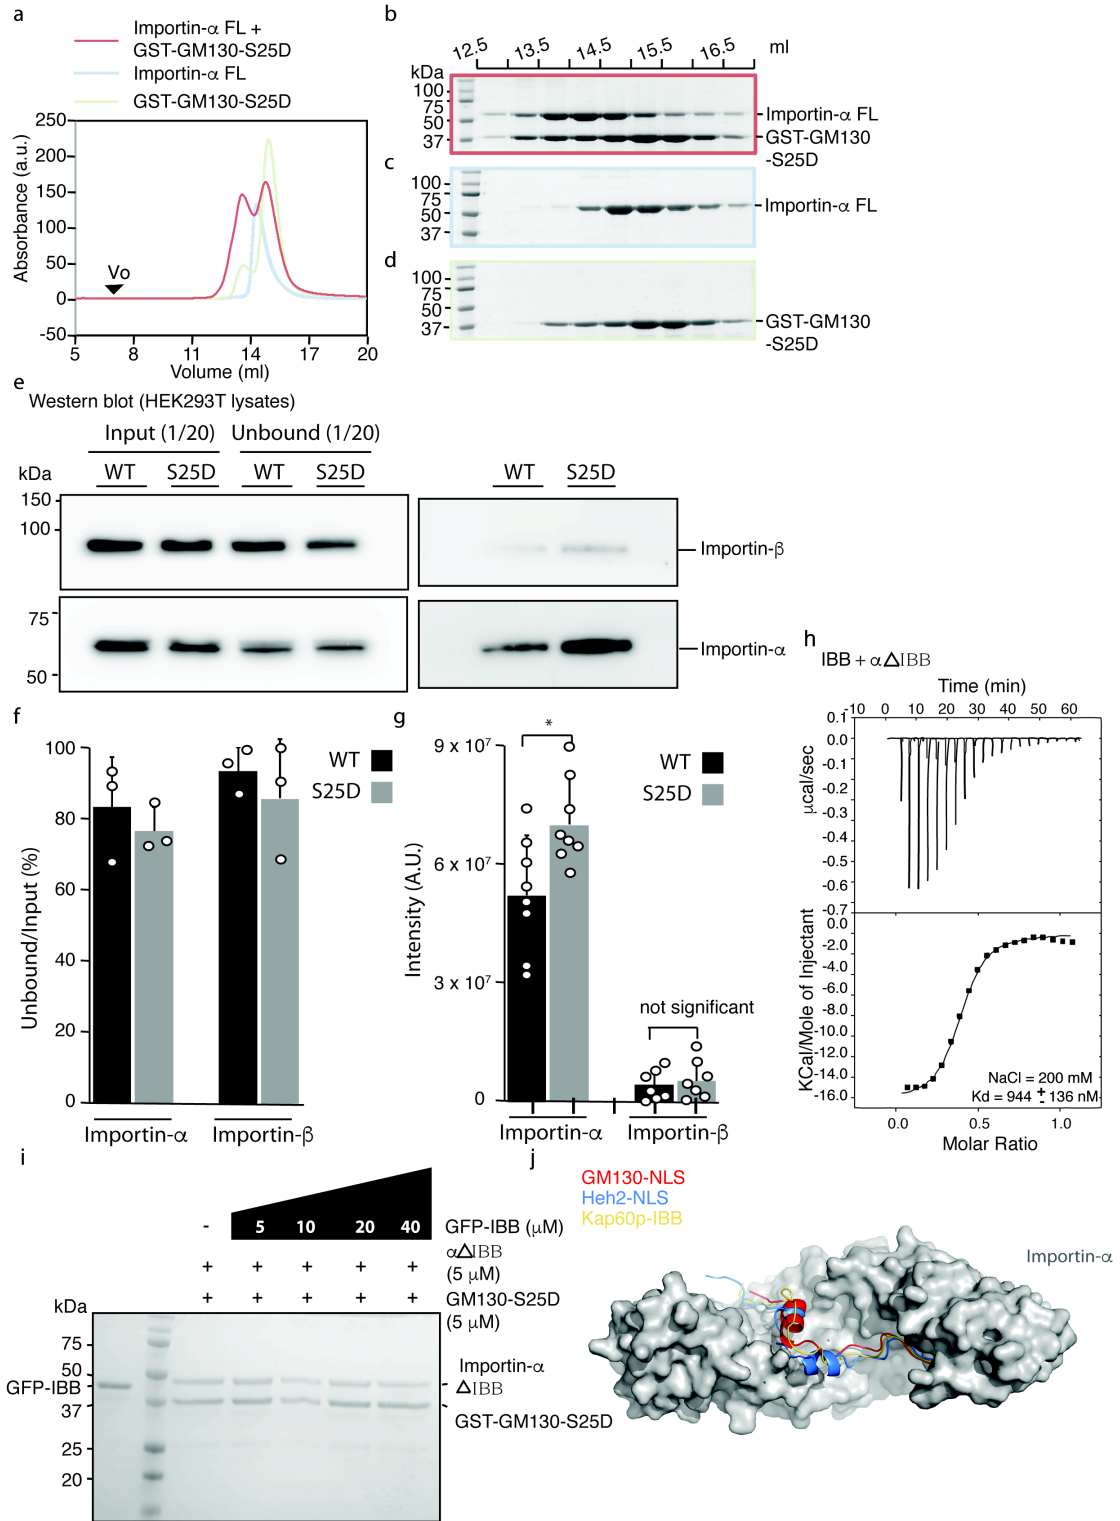

**Supplementary Figure 3. GM130 is resistant to IBB displacement upon interacting with Importin- $\alpha$  FL.**

**a-d, a**, SEC (Superdex 200) elution profile for full-length Importin- $\alpha$ •GST-GM130-S25D (red line), full-length Importin- $\alpha$  (blue line), and GST-GM130-WT (green line). The peak fractions of full-length Importin- $\alpha$ •GST-GM130-S25D (**b**), full-length Importin- $\alpha$  (**c**), and GST-GM130-WT (**d**) were analyzed by SDS-PAGE and stained with Coomassie blue. The void volume ( $V_0$ ) is indicated. **e**, Western blotting analysis of Importin- $\alpha$  pull-down by GST-GM130-WT and GST-GM130-S25D from HEK293T cell lysates. 1/20 of whole cell lysate (input) and of the total unbound proteins (unbound) is indicated. **f,g**, Band intensities of Importin- $\alpha$  and  $-\beta$  from the Western blotting in (**e**) were used to determine averages of protein in cell lysate (**f**), unbound protein (**f**) and bound protein (**g**). Data represent mean  $\pm$  standard deviation from three independent experiments. Differences were assessed statistically by two-tailed Student's *t* test; \**p* < 0.05. **h**, ITC titration curves (upper) and binding isotherms (lower) of Importin- $\alpha$ ( $\Delta$ IBB) with IBB. The data was acquired under the same acquisition conditions as in Fig. 1D-F to determine  $K_d$  values for Importin- $\alpha$ ( $\Delta$ IBB) with different GM130 peptides.  $K_d$  values are indicated. **i**, Competition binding assay. GST-GM130-S25D and Importin- $\alpha$  were incubated with indicated concentrations of GFP-IBB. Samples pulled down by GST beads were analyzed by SDS-PAGE and stained with Coomassie blue. **j**, Superimposition of the GM130-NLS peptide (red) with Heh2-NLS and Kap60p-IBB. Importin- $\alpha$  (70-498) is shown in gray.

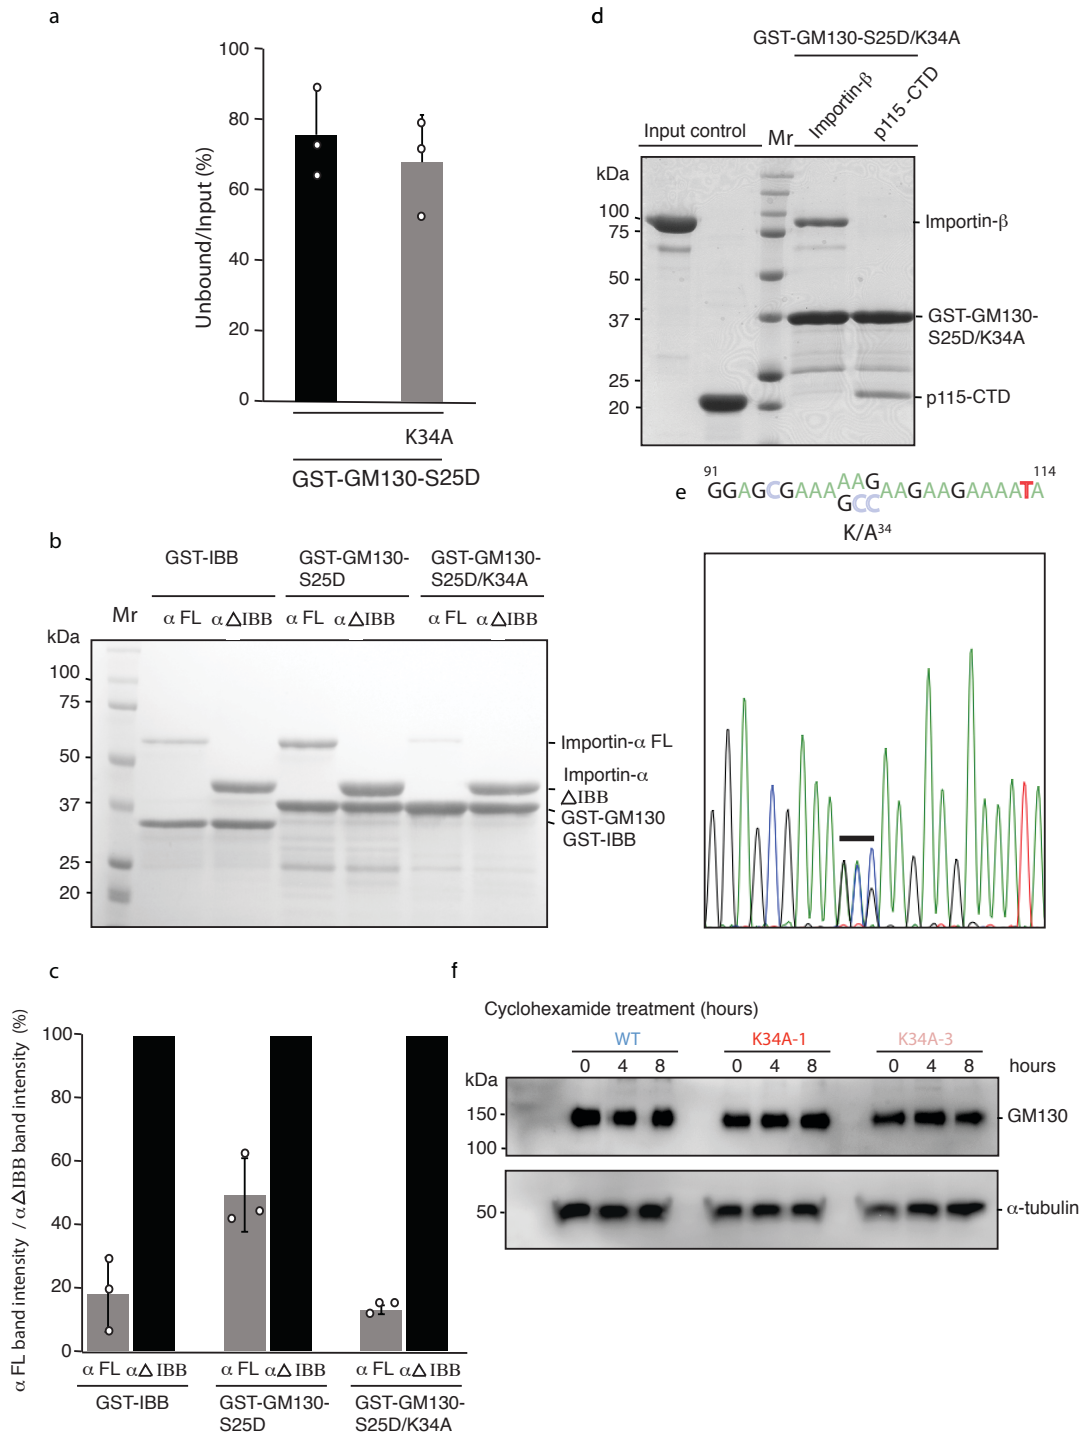

**Supplementary Figure 4. Biochemical properties of GM130 and validation of cell lines containing the GM130 K34A mutation.**

**a**, Band intensities of Importin- $\alpha$  from the Western blotting in **Fig. 5b** were used to determine averages of protein in cell lysate and unbound protein. Data represent mean  $\pm$  standard deviation from three independent experiments. **b**, GST pull-down analyses of GST-tagged IBB, GM130-S25D or GM130-S25D/K34A incubated with 2-fold molar excess of either Importin- $\alpha$  FL or Importin- $\alpha$  ( $\Delta$ IBB). **c**, Quantification of band intensities of bound Importin- $\alpha$  FL and Importin- $\alpha$  ( $\Delta$ IBB) from the gel in (**c**), plotted as the ratio of Importin- $\alpha$  ( $\Delta$ IBB) over Importin- $\alpha$  FL. Data represent mean  $\pm$  standard deviation from three independent experiments. **d**, GST pulldown assays of GM130-S25D/K34A with Importin- $\beta$  or p115-CTD. GST-fused GM130-S25D/K34A was incubated with Importin- $\beta$  or p115-CTD at a molar ratio of 1:1. GST-bound samples were analyzed by SDS-PAGE and stained with Coomassie blue. **e**, A representative sequence electropherogram of the heterozygous GM130 K34A mutant. The black bar indicates the heterozygous nucleotides. Nucleotide and residue numbers are indicated. **f**, GM130 wild-type and K34A mutant HEK293T cell lines were mock-treated or treated with cycloheximide for the indicated timeframes, followed by Western blot analysis using GM130 and  $\alpha$ -tubulin antibodies.

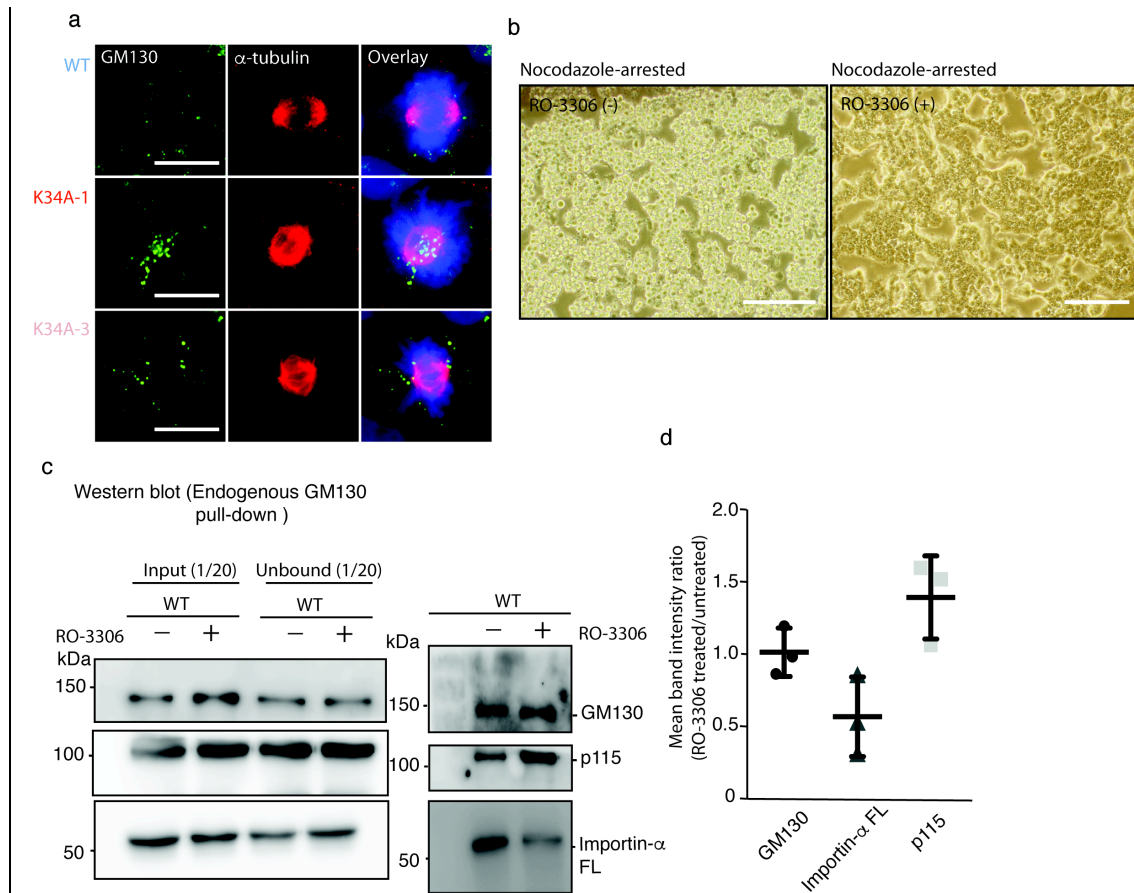

**Supplementary Figure 5. Cell-based examination of the K34A mutation of GM130.**

**a**, Representative fluorescent images of wild-type and two K34A mutant cell lines at metaphase. Cells were immuno-stained with GM130 antibody (green; left panel),  $\alpha$ -tubulin (red, middle panel) and DAPI (blue, right panel). Scale bar: 10  $\mu$ m. **b**, Images of nocodazole-arrested HEK293T cells without (left) and with (right) RO-3306 treatment acquired by bright-field illumination. Scale bar: 100  $\mu$ m. **c**, Endogenous Importin- $\alpha$  and p115 were pulled down from nocodazole-arrested HEK293T cells treated (+) and untreated (-) with RO-3306 using GM130 antibody. Pulldown samples were analyzed by Western blot using antibodies for GM130, Importin- $\alpha$  and p115. 1/20 of whole cell lysate (input) and of the total unbound proteins (unbound) is indicated. **d**, Analysis of Importin- $\alpha$  and p115 pulldown by GM130 from RO-3306-treated and -untreated RO-3306 cell lysates. The scatter plot shows the ratios of the GM130, Importin- $\alpha$  and p115 band intensities for RO-3306 treated cells over untreated cells. Each dot represents an individual data point. Data represent mean  $\pm$  standard deviation from three independent experiments.



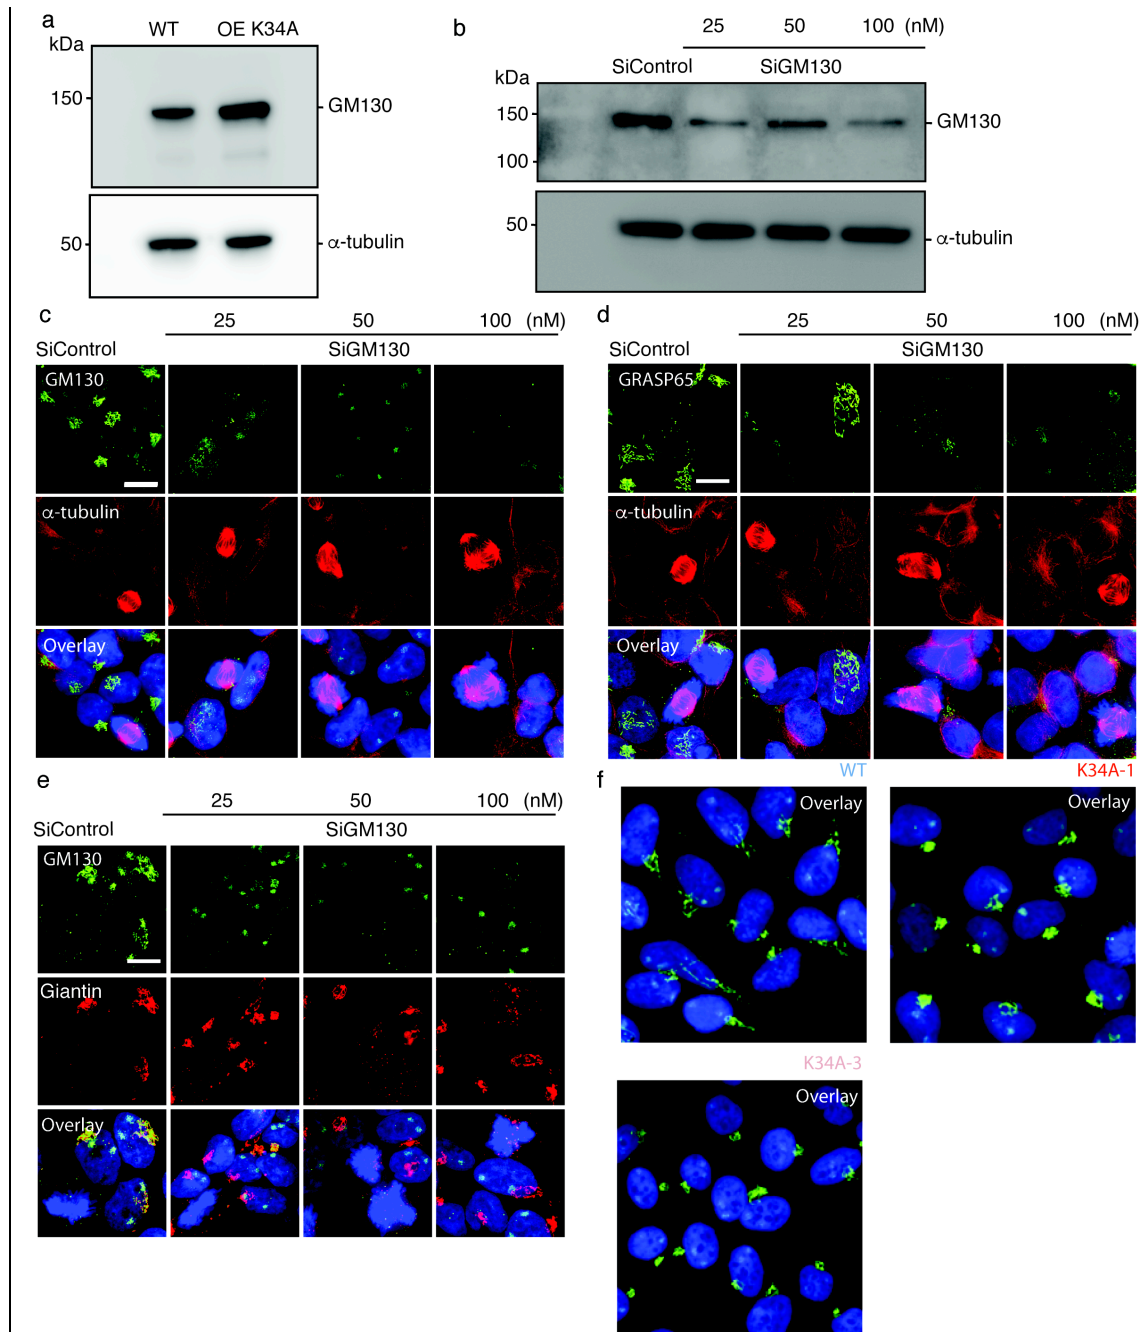

**Supplementary Figure 6. Cell-based examination of GM130 K34A mutation overexpression and siRNA-mediated GM130 knockdown.**

**a**, HEK293T cells overexpressing the GM130 K34A mutant were analyzed by Western blot using GM130 and  $\alpha$ -tubulin antibodies. **b**, HEK293T cells were treated with indicated concentrations of siRNA oligonucleotides, followed by Western blot analysis using GM130 and  $\alpha$ -tubulin antibodies. **c,d,e**, Representative fluorescent images of wild-type HEK293T cells treated with indicated siRNA oligonucleotides and subsequently immuno-stained with GM130 (**c**), GRASP65 (**d**) or Giantin (**e**) antibodies. GM130 and GRASP65 are shown in green (top);  $\alpha$ -tubulin and Giantin are shown in red (middle). Overlay images with DAPI staining (blue) are shown in the bottom panels. Scale bar: 10  $\mu$ m. **f**, Merged immunofluorescence images of wild-type and K34A mutant cells in interphase. Cells were immuno-stained with GM130 antibody (colored green) and DAPI (colored blue).

Fig. 5b

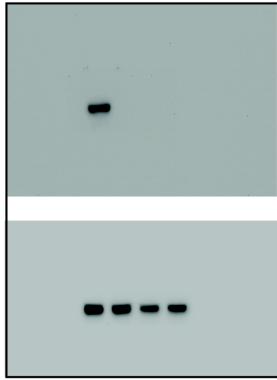

Fig. 6i

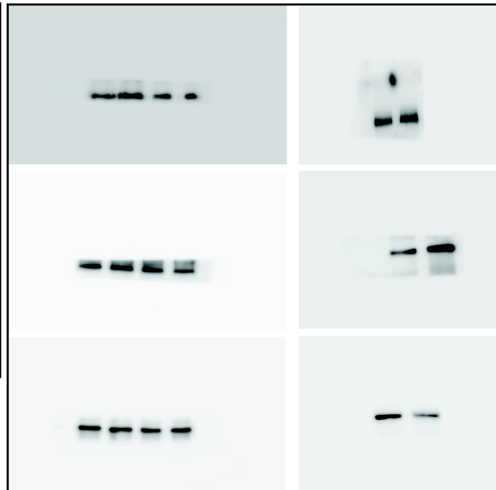

Supplementary Figure 3e

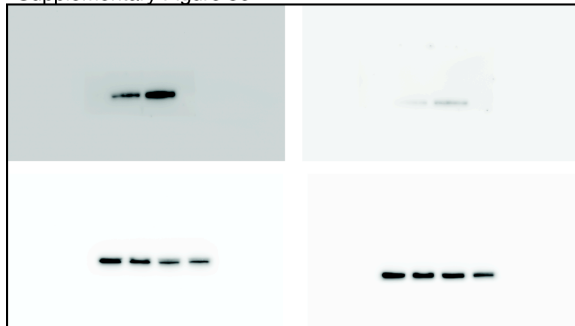

Supplementary Figure 4f

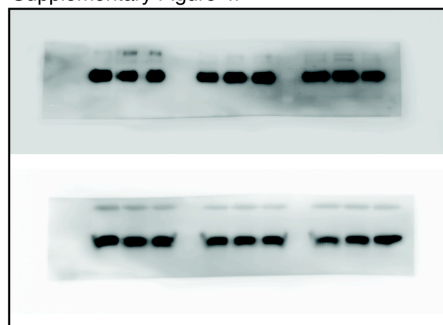

Supplementary Figure 5c

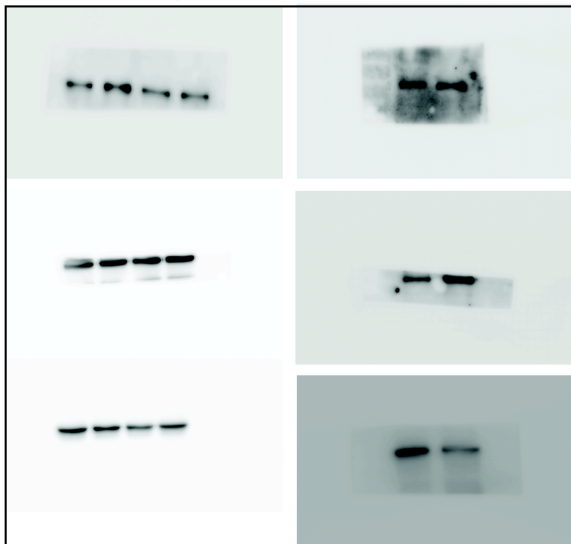

Supplementary Figure 6a

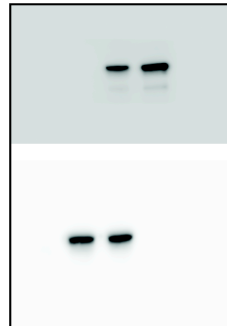

Supplementary Figure 6b

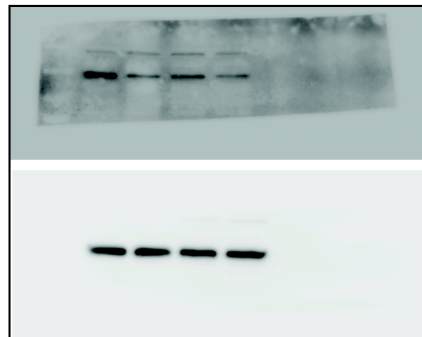

**Supplementary Figure 7.** Uncropped images of Western blots shown in the main and supplementary figures.

**Supplementary Table 1: Primer sequences**

| <b>Primer</b>                  | <b>Sequence</b>                                                                                                                                                     |
|--------------------------------|---------------------------------------------------------------------------------------------------------------------------------------------------------------------|
| GM130 (1-48)-F                 | CTCCAAAATCGGATCCATGAGCGAAGAAACCCGTC                                                                                                                                 |
| GM130 (1-48)-R                 | GGCCGCTCGAGTCGACTTAGGTGGTGGTTCCGG                                                                                                                                   |
| GM130 (1-85)-F                 | GGGGCCCTGGGATCCATGAGCGAAGAAACCCGTC                                                                                                                                  |
| GM130 (1-85)-R                 | GGCCGCTCGAGTCGACTTACAGGCTCGCGCCCGG                                                                                                                                  |
| GM130 FL-F                     | CATAGAAGATTCTAGAATGTCGGAAGAAACCCGACAGA                                                                                                                              |
| GM130 FL-R                     | TCGCGGCCGCGGATCCTTAGATGACAGTGATCTTCACCTCA                                                                                                                           |
| GM130-S25D-F                   | TACCAGCAGCGTAAC GACCCGGGCGTTC                                                                                                                                       |
| GM130-S25D-R                   | GAACGCCCGG GTC GTTACGCTGCTGGTA                                                                                                                                      |
| GM130-K14A-F                   | AAACTGGCGGCGGCGGCGGCGAAAAAACTGCGTGAATAC                                                                                                                             |
| GM130-K14A-R                   | GTATTCACGCAGTTTTTTTCGCCGCCGCCGCCAGTTT                                                                                                                               |
| GM130-K34A-F                   | GTTCCGACCGGCGCGAAAGCGAAAAAGAAAATCAAAAAC                                                                                                                             |
| GM130-K34A-R                   | GTTTTTGATTTTCTTTTTTCGCTTTCGCGCCGGTTCGGAAC                                                                                                                           |
| p115 (780-930)-F               | CGCGCGGCAGCCATATGGCTAGAGATTCTGAACAAGT                                                                                                                               |
| p115 (780-930)-R               | GGTGGTGGTGCTCGAGTTAACCAAGATCCTTGAGTTT                                                                                                                               |
| Importin- $\alpha$ (70-478)-F1 | CAGCCAGGATCCGAATTTCGAACCAGGGTACTGTAAA                                                                                                                               |
| Importin- $\alpha$ (70-478)-R1 | TTCTTTACCAGACTCGAGTTACACTGAGAAGTACTTCT                                                                                                                              |
| Importin- $\alpha$ (70-478)-F2 | GGGGCCCTGGGATCCAACCAGGGTACTGTAAATT                                                                                                                                  |
| Importin- $\alpha$ (70-478)-R2 | GGTGGTGGTGCTCGAGCACTGAGAAGTACTTCTCA                                                                                                                                 |
| IBB-F                          | TTCAGGGCGCGGCCGCAATGTCCACGAACGAGAAT                                                                                                                                 |
| IBB-R                          | CTCACCATGCCCTCGAG GTTCCGGTTTTCTGTAG                                                                                                                                 |
| Importin- $\alpha$ FL-F        | AGGAGATATAACCATGGGCATGTCCCCTATACTAGG                                                                                                                                |
| Importin- $\alpha$ FL-R        | GGTGGTGGTGCTCGAGCACTGAGAAGTACTTCTCA                                                                                                                                 |
| Importin- $\beta$ FL-F         | AGGAGATATAACCATGGGCATGTCCCCTATACTAGG                                                                                                                                |
| Importin- $\beta$ FL-R         | GGTGGTGGTGCTCGAGTGCAGCTTCATAAGCAGCT                                                                                                                                 |
| GM130 sgRNA-F                  | CACCGTTCTTCTTTTTTCGCTCCTGT                                                                                                                                          |
| GM130 sgRNA-R                  | AAAC ACAGGAGCGAAAAAGAAGAAC                                                                                                                                          |
| GM130 Donor template           | CTCATGAATATTATTGCTCTTCTTTTTCCACAGTTGAGAGAATATC<br>AGCAGAGGAATAGCCCTGGTGTTCCTACAGGAGCGAAAGCCAA<br>GAAGAAAATAAAAAATGGCAGTAACCCTGAGACAACCACTTCT<br>GGTGGTTGCCACTCACCTG |
| Genotype GM130-F               | GCCATGGTATCAATCCCTCTCAG                                                                                                                                             |
| Genotype GM130-R               | TTTAGGACAGCAGGCCCTGTAC                                                                                                                                              |
